# Supplementary material for: Lignans Extract from Knotwood of Norway Spruce—A Possible New Weapon against GTDs
Source: MDPI journal article supplement (doi:10.3390/jof8040357), 2022-03-30
Supplement: s1 [file s1]

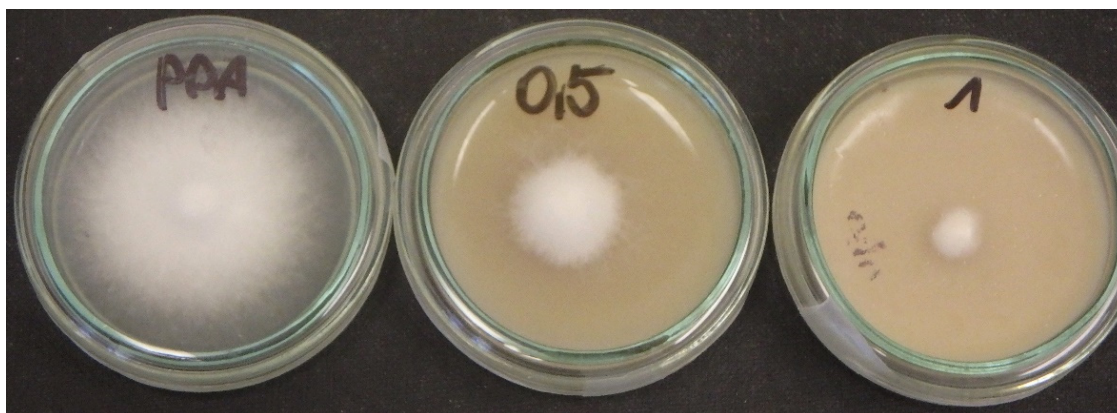

**Figure S1.** *Eutypa lata* (strain MEND-F-0015) on PDA plates supplemented with GE five days after incubation. Numbers on plates represent different concentrations of HMR in medium, from the left: control, 0.5 and 1 mg. ml<sup>-1</sup>.
