# Supplementary material for: Lignans Extract from Knotwood of Norway Spruce—A Possible New Weapon against GTDs
Source: MDPI journal article supplement (doi:10.3390/jof8040357), 2022-03-30
Supplement: s1 [file s1]

| Control 10-days          | GE 10-days                 | Control 180-days       | GE 180-days               |
|--------------------------|----------------------------|------------------------|---------------------------|
| <i>Sigarispora</i>       | <i>Typhula</i>             | <i>Cephalotrichum</i>  | <i>Cuniculitrema</i>      |
| <i>Epicoccum</i>         | <i>Lopadostoma</i>         | <i>Umbelopsis</i>      | <i>Cystobasidium</i>      |
| <i>Wojnowiciella</i>     | <i>Diatrypella</i>         | <i>Diplodia</i>        | <i>Camarosporioides</i>   |
| <i>Spumatoria</i>        | <i>Rachicladosporium</i>   | <i>Veronaea</i>        | <i>Pichia</i>             |
| <i>Belonopsis</i>        | <i>Pleiochaeta</i>         | <i>Coprinellus</i>     | <i>Monilia</i>            |
| <i>Myriangium</i>        | <i>Curvularia</i>          | <i>Pseudeurotium</i>   | <i>Periconia</i>          |
| <i>Plenodomus</i>        | <i>Dictyosporium</i>       | <i>Sistotrema</i>      | <i>Aquilomyces</i>        |
| <i>Cercophora</i>        | <i>Trematosphaeria</i>     | <i>Bipolaris</i>       | <i>Phaeomollisia</i>      |
| <i>Lyomyces</i>          | <i>Rhynchosporium</i>      | <i>Cosmospora</i>      | <i>Lasiodiplodia</i>      |
| <i>Sphaerulina</i>       | <i>Minimelanolocus</i>     | <i>Sporisorium</i>     | <i>Dimorphosporicola</i>  |
| <i>Ochrocladosporium</i> | <i>Vermiconia</i>          | <i>Microascus</i>      | <i>Serendipita</i>        |
| <i>Coniosporium</i>      | <i>Bionectria</i>          | <i>Hirsutella</i>      | <i>Parapenidiella</i>     |
| <i>Macrophoma</i>        | <i>Mycena</i>              | <i>Leptodontidium</i>  | <i>Septoria</i>           |
| <i>Helicodendron</i>     | <i>Katumotoa</i>           | <i>Buckleyzyma</i>     | <i>Acrostalagmus</i>      |
| <i>Naganishia</i>        | <i>Collariella</i>         | <i>Teichospora</i>     | <i>Leucaenicola</i>       |
| <i>Cylindrocladiella</i> | <i>Melanocarpus</i>        | <i>Taphrina</i>        | <i>Thelonectria</i>       |
| <i>Allophoma</i>         | <i>Preussia</i>            | <i>Harposporium</i>    | <i>Quambalaria</i>        |
| <i>Tubeufia</i>          | <i>Stagonospora</i>        | <i>Dothiora</i>        | <i>Coprinopsis</i>        |
| <i>Stachybotrys</i>      | <i>Robillarda</i>          | <i>Radulidium</i>      | <i>Amorphotheca</i>       |
| <i>Cystofilobasidium</i> | <i>Fuscostagonospora</i>   | <i>Neostagonospora</i> | <i>Dialonectria</i>       |
| <i>Populocrescentia</i>  | <i>Pleurostoma</i>         | <i>Umbilicaria</i>     | <i>Phialemonium</i>       |
|                          | <i>Humicola</i>            | <i>Papillotrema</i>    | <i>Peniophora</i>         |
|                          | <i>Allantophomopsiella</i> | <i>Moesziomyces</i>    | <i>Neoascochyta</i>       |
|                          | <i>Chromelosporium</i>     | <i>Skyttea</i>         | <i>Holtermanniella</i>    |
|                          | <i>Hermatomyces</i>        | <i>Xenasmatella</i>    | <i>Ophiostoma</i>         |
|                          |                            | <i>Fusicolla</i>       | <i>Xenoramularia</i>      |
|                          |                            | <i>Clitopilus</i>      | <i>Pyrenochaetopsis</i>   |
|                          |                            | <i>Devriesia</i>       | <i>Libertasomyces</i>     |
|                          |                            | <i>Monocillium</i>     | <i>Phaeosphaeria</i>      |
|                          |                            |                        | <i>Pleopsidium</i>        |
|                          |                            |                        | <i>Pseudocosmospora</i>   |
|                          |                            |                        | <i>Nemania</i>            |
|                          |                            |                        | <i>Cylindrocarpon</i>     |
|                          |                            |                        | <i>Melanocucurbitaria</i> |
|                          |                            |                        | <i>Didymocrea</i>         |
|                          |                            |                        | <i>Microsporum</i>        |
|                          |                            |                        | <i>Extremus</i>           |
|                          |                            |                        | <i>Quadricrura</i>        |
|                          |                            |                        | <i>Nigrograna</i>         |
|                          |                            |                        | <i>Volutella</i>          |
