# Supplementary material for: Lignans Extract from Knotwood of Norway Spruce—A Possible New Weapon against GTDs
Source: MDPI journal article supplement (doi:10.3390/jof8040357), 2022-03-30
Supplement: s1 [file s1]

| <b>Fungus</b>            | <b>GE [1 mg.ml HMR]</b> | <b>HMR™ [1 mg.ml HMR]</b> |
|--------------------------|-------------------------|---------------------------|
| <i>C. luteo-olivacea</i> | 100                     | 47                        |
| <i>Da. torresensis</i>   | 100                     | 71.1                      |
| <i>D. ampelina</i>       | 62.5                    | 67.5                      |
| <i>D. bohemiae</i>       | 58.4                    | 58.1                      |
| <i>Dip. seriata</i>      | 30                      | 5                         |
| <i>E. lata</i>           | 79                      | 72                        |
| <i>P. minimum</i>        | 100                     | 26.6                      |

**Table S1.** Comparison of inhibition effects of GE vs. HMR™ on the growth of GTD fungi *in vitro* [%] after five days of incubation for all fungi except *C. luteo-olivacea* and *P. minimum*, which were measured after 10 days.
