# Supplementary material for: Lignans Extract from Knotwood of Norway Spruce—A Possible New Weapon against GTDs
Source: MDPI journal article supplement (doi:10.3390/jof8040357), 2022-03-30
Supplement: s1 [file s1]

| Fungus                   | concentration of HMR in GE plates [mg.ml <sup>-1</sup> ] |      |      |
|--------------------------|----------------------------------------------------------|------|------|
|                          | 0.1                                                      | 0.5  | 1    |
| <i>C. luteo-olivacea</i> | 25.8                                                     | 41.7 | 100  |
| <i>Da. torresensis</i>   | 30.7                                                     | 65.3 | 100  |
| <i>D. ampelina</i>       | 47.5                                                     | 60   | 62.5 |
| <i>D. bohemiae</i>       | 32.4                                                     | 55.8 | 58.4 |
| <i>Dip. seriata</i>      | 0                                                        | 27.5 | 30   |
| <i>E. lata</i>           | 32.8                                                     | 60.8 | 79   |
| <i>P. minimum</i>        | 0                                                        | 26.6 | 100  |

**Table S1.** Inhibition effects of GE on the growth of GTD fungi *in vitro* [%] after five days of incubation for all fungi except *C. luteo-olivacea* and *P. minimum*, which were measured after 10 days.
