# Supplementary figures and images for: Lignans Extract from Knotwood of Norway Spruce—A Possible New Weapon against GTDs
Source: MDPI journal article supplement (doi:10.3390/jof8040357), 2022-03-30

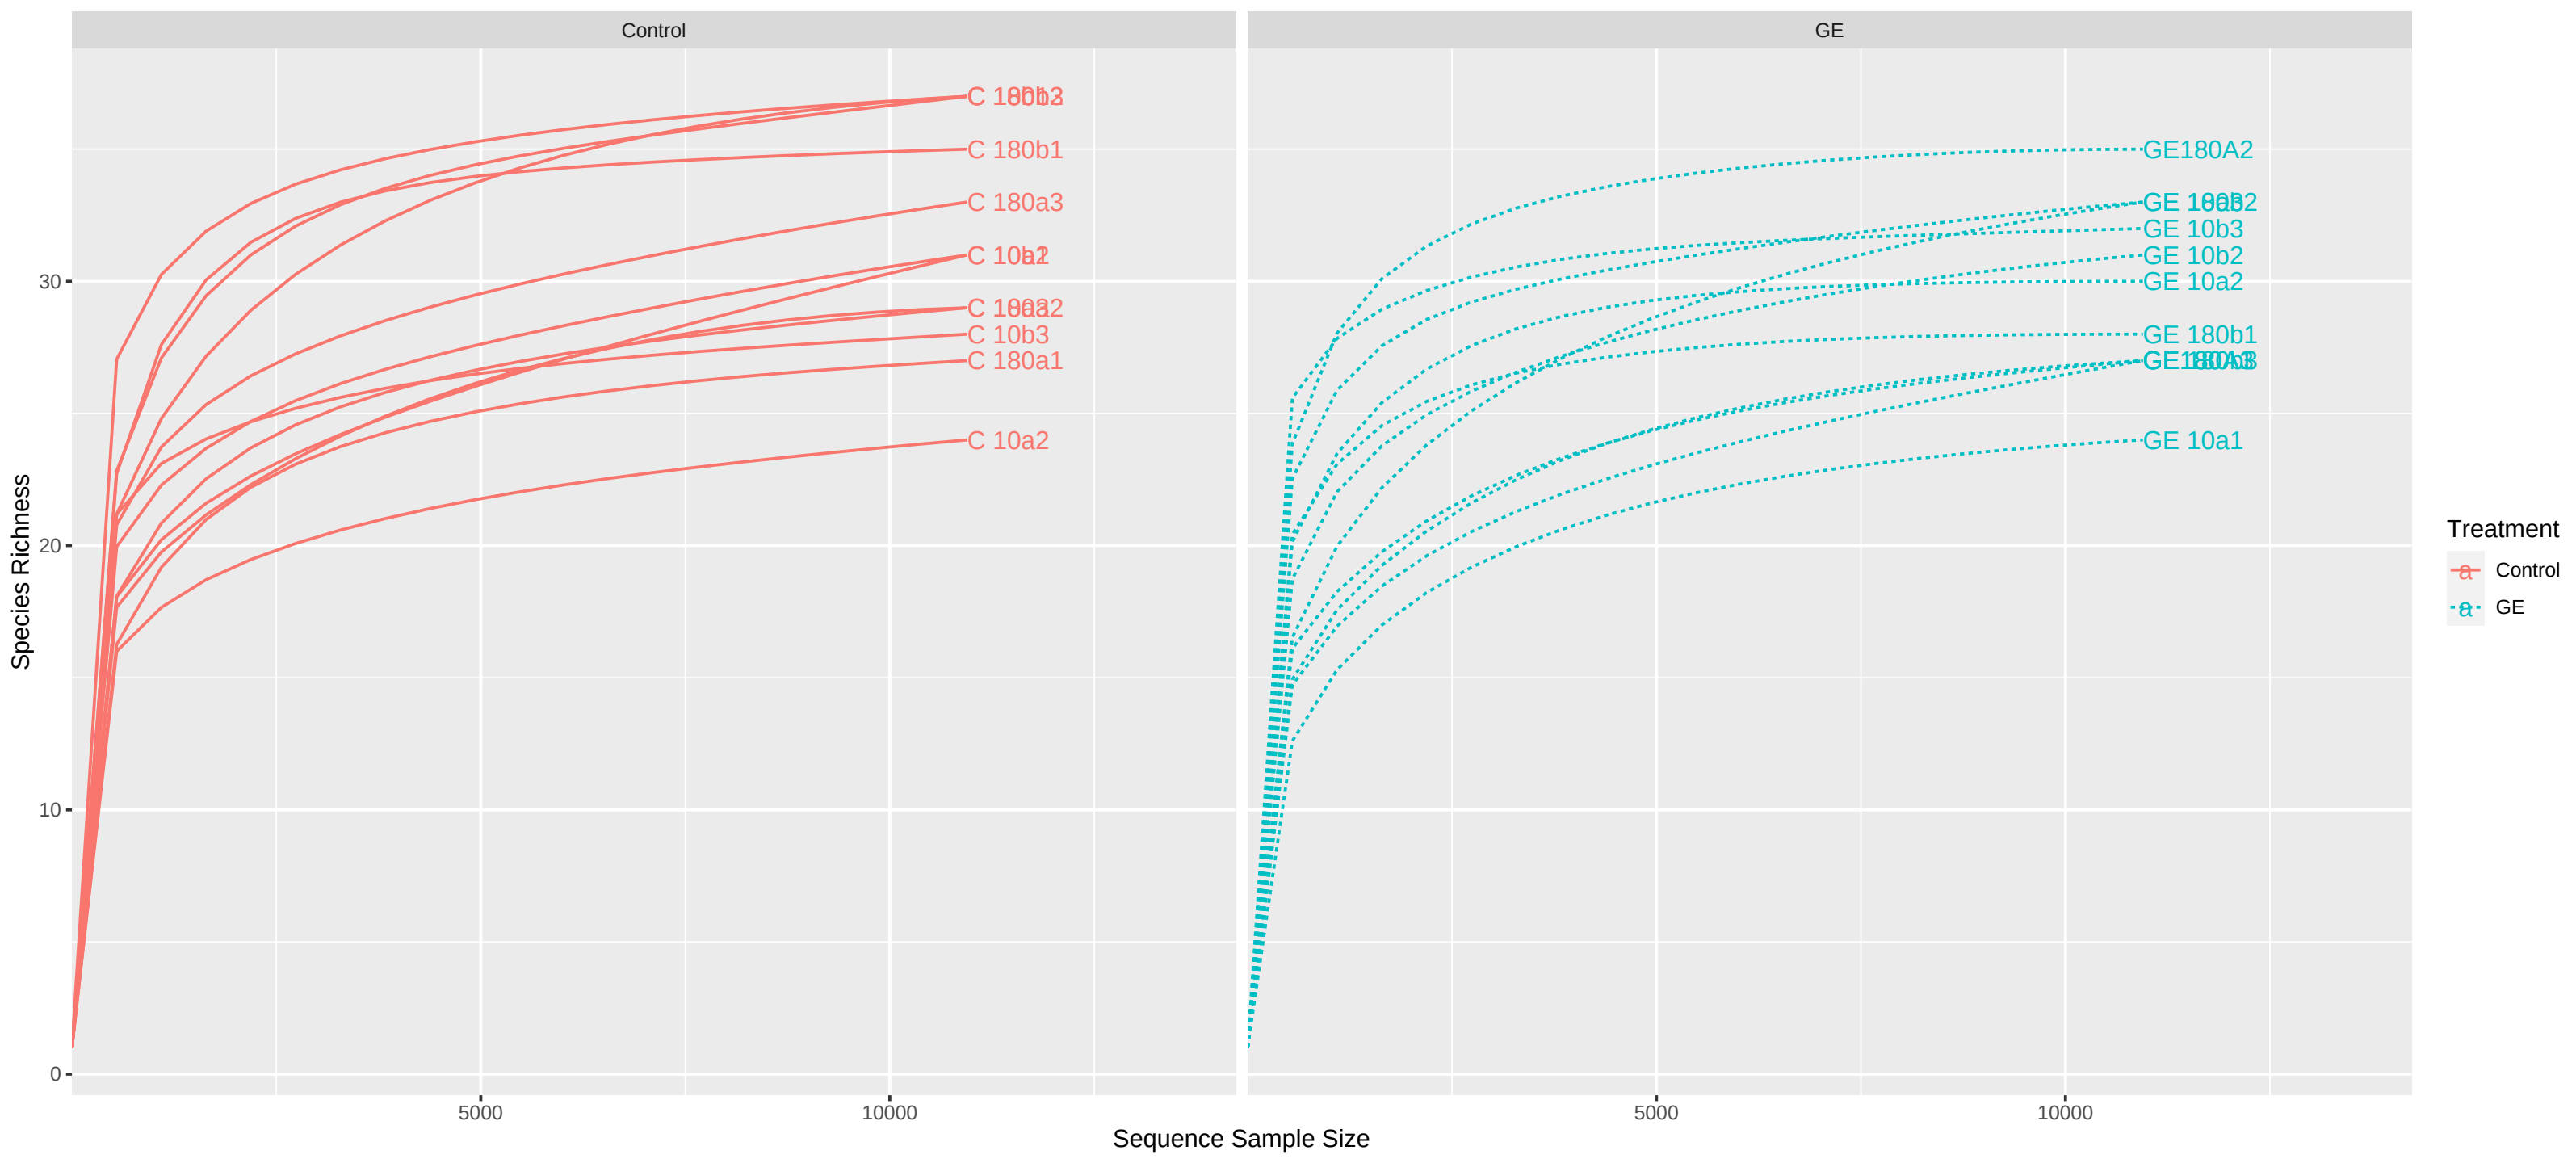

Supplement: s1 [file s1]

a

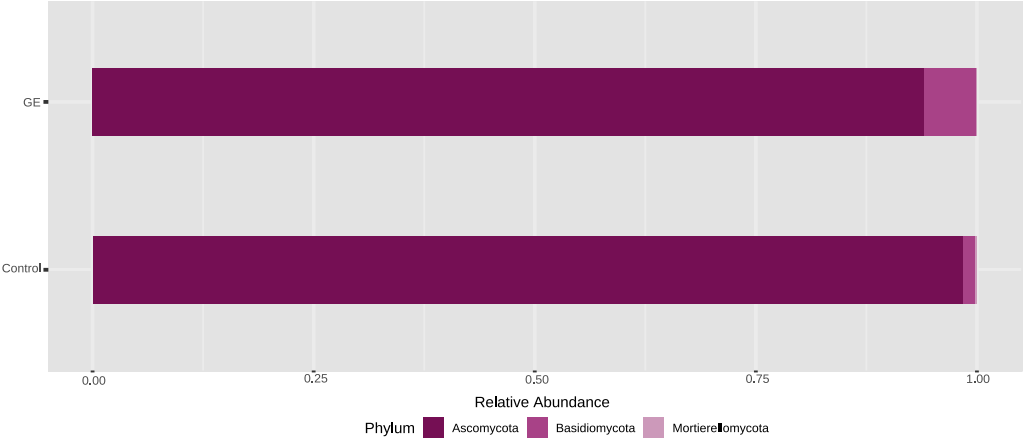

b

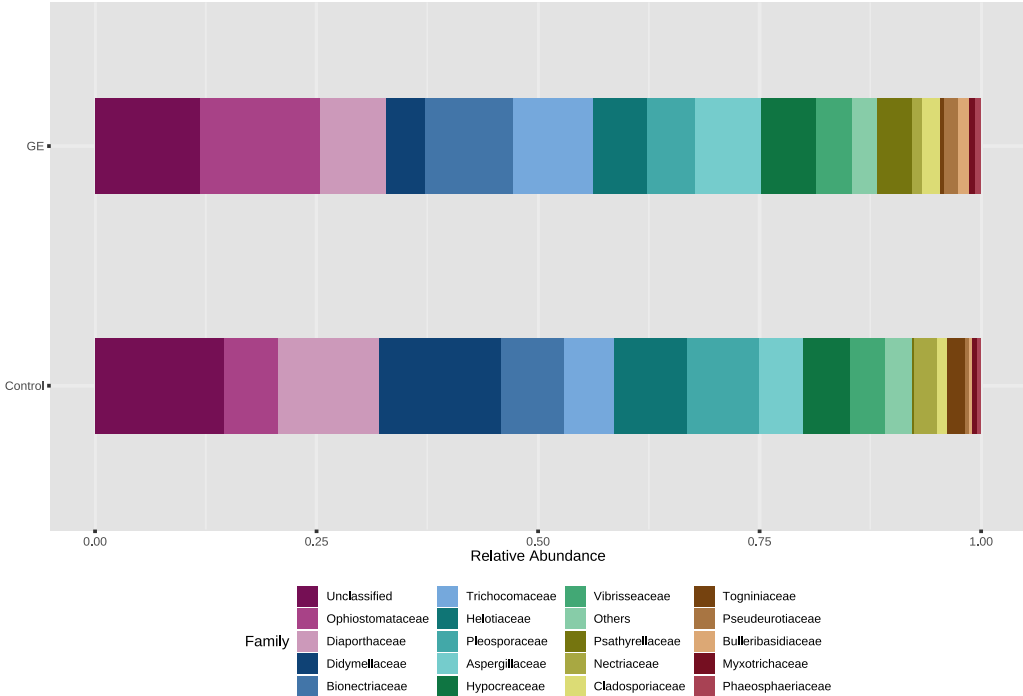

c

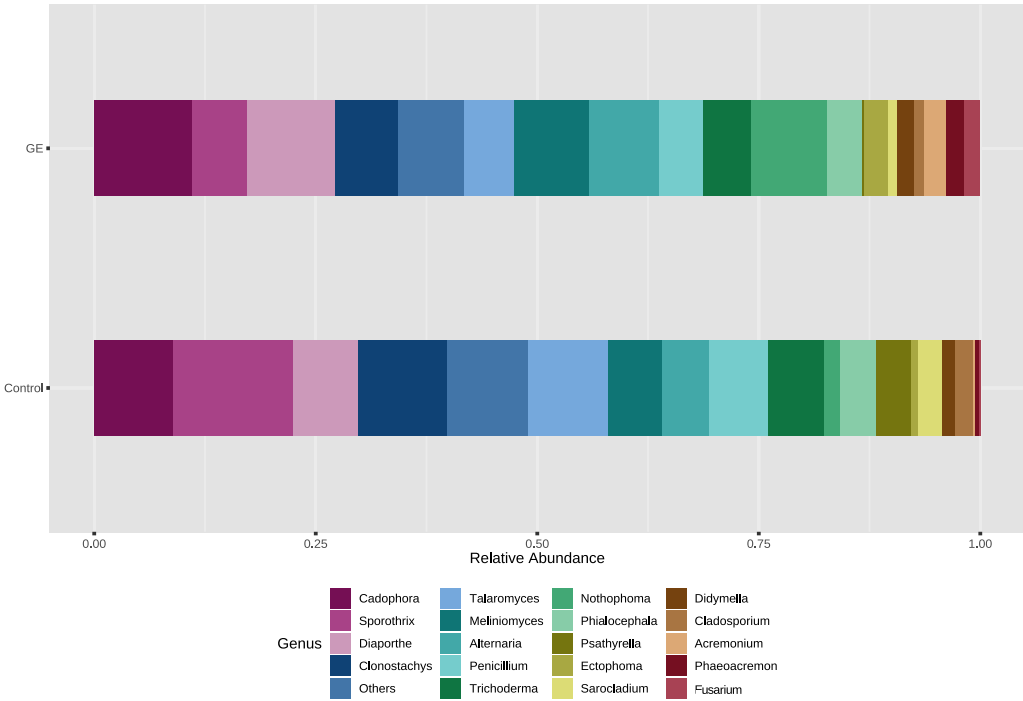

Supplement: s1 [file s1]

a

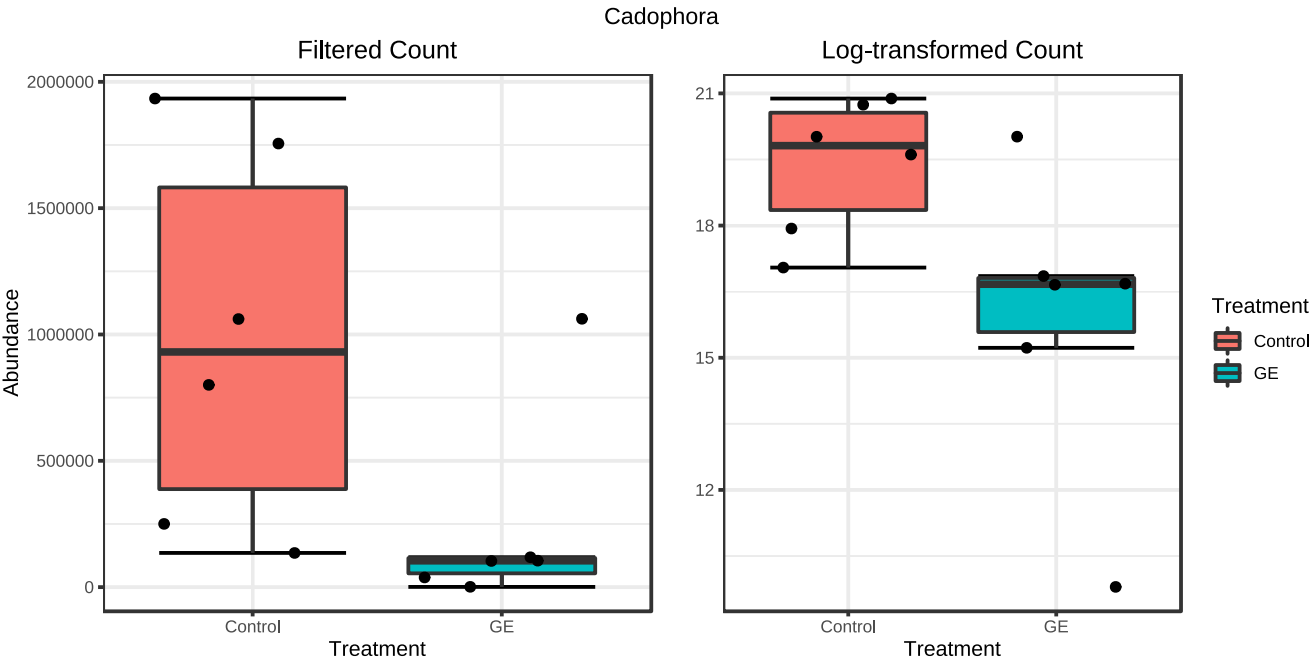

b

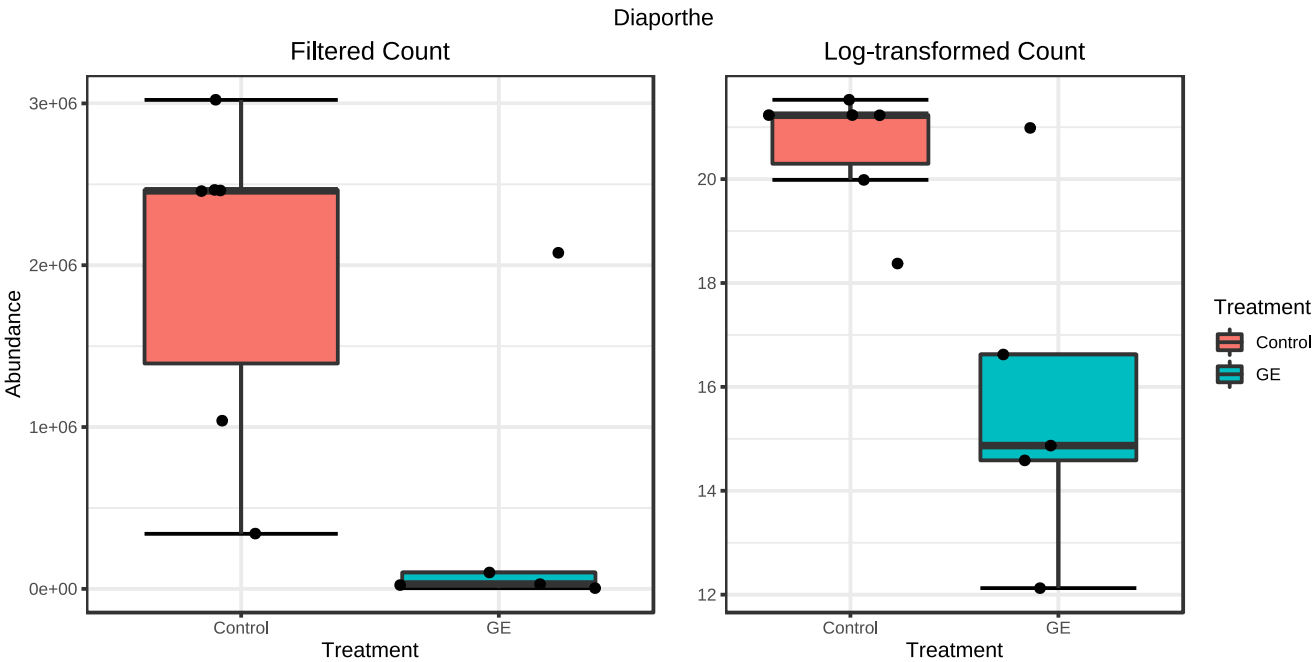

c

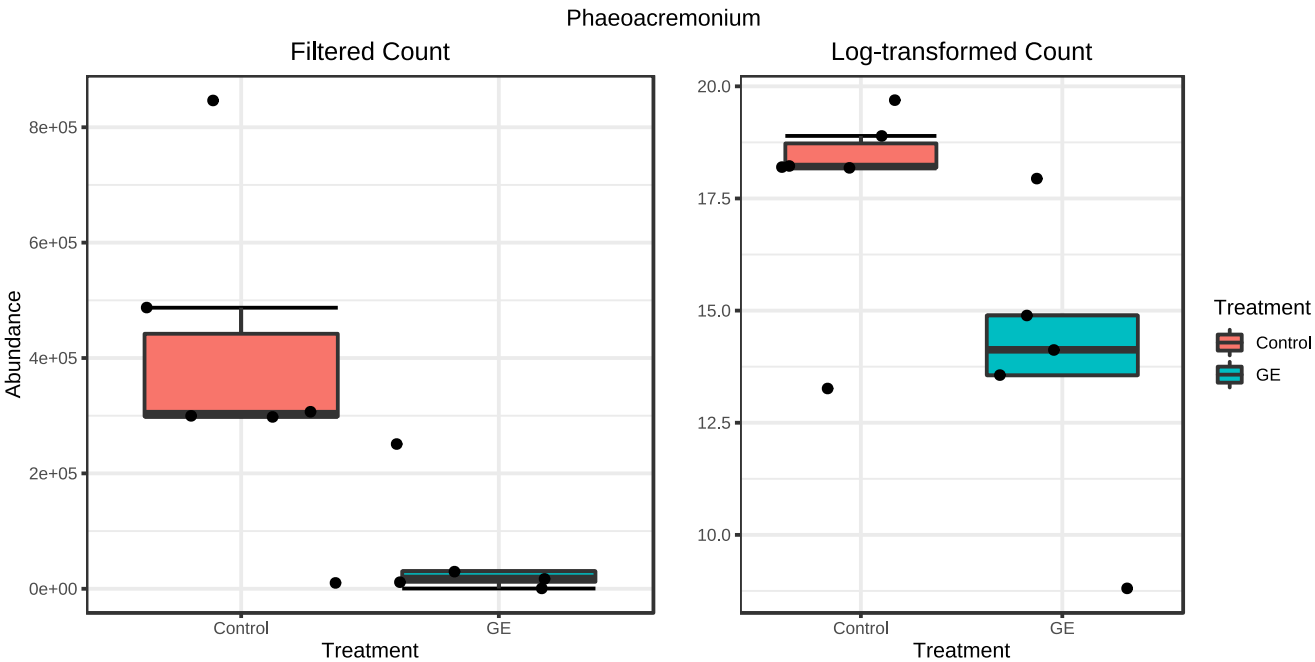

Supplement: s1 [file s1]

# Library Size Overview

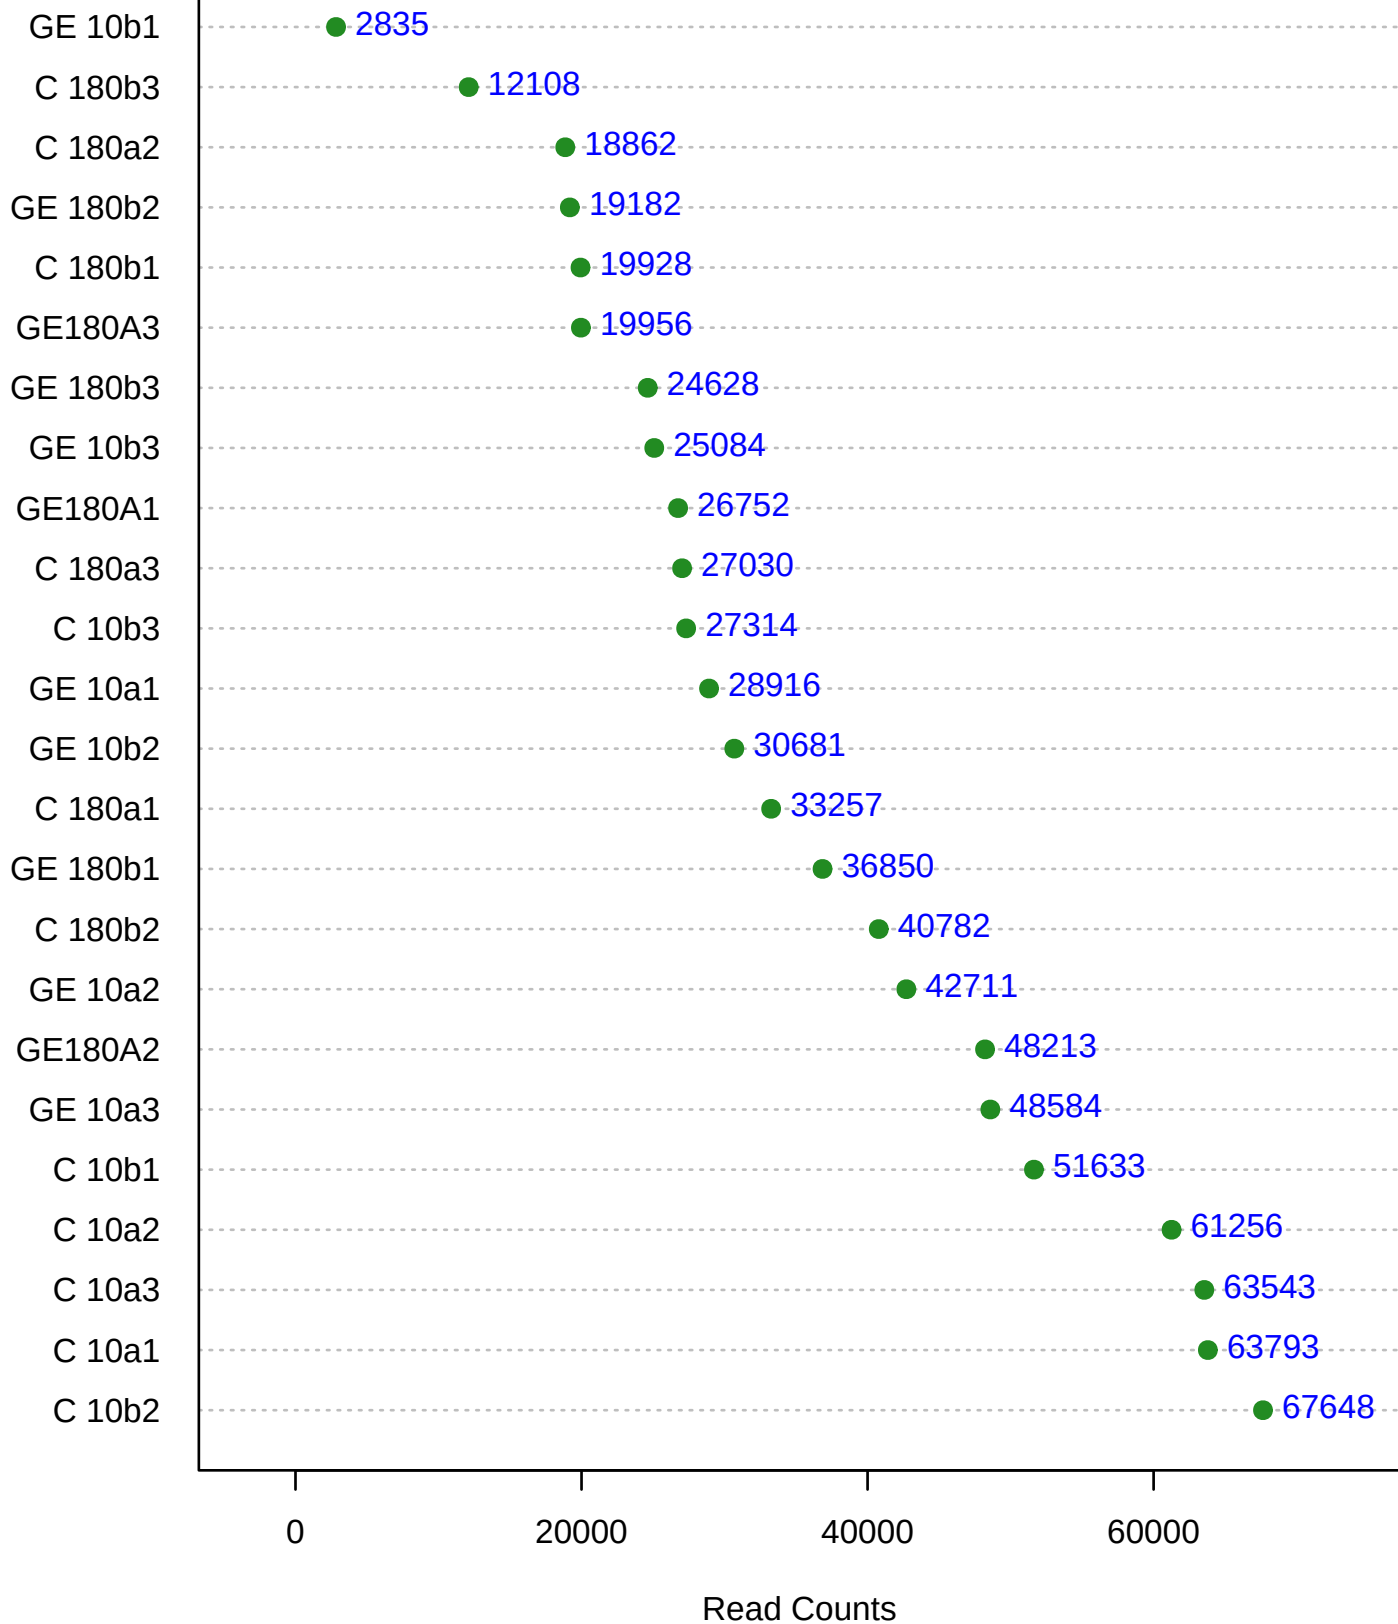

Supplement: s1 [file s1]
